# Supplementary material for: Spatio-temporal patterns of proportions of influenza B cases
Source: PubMed Central journal article supplement (PMC5220367; doi:10.1038/srep40085), 2017-01-09
Supplement: srep40085-s1.pdf [file srep40085-s1.pdf]

# Spatio-temporal patterns of proportions of influenza B cases

Daihai He<sup>1</sup>, Alice PY Chiu<sup>1</sup>, Qianying Lin<sup>1</sup> and Duo Yu<sup>2</sup>

<sup>1</sup> Department of Applied Mathematics, Hong Kong Polytechnic University

Hung Hom, Kowloon, Hong Kong (SAR) China

<sup>2</sup> Department of Biostatistics, School of Public Health

University of Texas Health Science Center at Houston, United States

November 12, 2016

## Supplementary Material

### Contents

|                                                                                |           |
|--------------------------------------------------------------------------------|-----------|
| <b>S1 Effects of excluding data from 2010 and 2011</b>                         | <b>2</b>  |
| <b>S2 Proportions of B virus v.s. country median age</b>                       | <b>2</b>  |
| <b>S3 Patterns of total confirmations</b>                                      | <b>3</b>  |
| <b>S4 Patterns of proportions of B Lineages</b>                                | <b>5</b>  |
| S4.1 Proportions of B Lineages v.s. median age . . . . .                       | 5         |
| S4.2 Confirmations of B Lineages v.s. effective distances . . . . .            | 6         |
| S4.3 Proportions of B Lineages v.s. longitude and latitude . . . . .           | 8         |
| <b>S5 A variety of models with or without region as a random-effect factor</b> | <b>10</b> |

## S1 Effects of excluding data from 2010 and 2011

Table S1: Effects of setting the start date to 2011-1 and 2012-1.

| factor    | ref country | time interval     | $n$ | $\theta$ | $\rho$ | 95%CI           | $p$ -value | signif |
|-----------|-------------|-------------------|-----|----------|--------|-----------------|------------|--------|
| effd1     | Mexico      | 2011-1 to 2015-40 | 31  | 2000     | 0.633  | ( 0.359, 0.806) | 1.324e-04  | ***    |
| effd2     | Mexico      | 2011-1 to 2015-40 | 31  | 2000     | 0.652  | ( 0.388, 0.818) | 6.957e-05  | ****   |
| effd1     | China       | 2011-1 to 2015-40 | 31  | 2000     | -0.167 | (-0.492, 0.199) | 0.3683     |        |
| longitude | -           | 2011-1 to 2015-40 | 31  | 2000     | 0.558  | ( 0.255, 0.762) | 0.0011     | **     |
| latitude  | -           | 2011-1 to 2015-40 | 31  | 2000     | 0.116  | (-0.248, 0.452) | 0.5341     |        |
| effd1     | Mexico      | 2011-1 to 2016-8  | 31  | 2000     | 0.450  | ( 0.114, 0.694) | 0.0110     | *      |
| effd2     | Mexico      | 2011-1 to 2016-8  | 31  | 2000     | 0.513  | ( 0.194, 0.734) | 0.0032     | **     |
| effd1     | China       | 2011-1 to 2016-8  | 31  | 2000     | -0.234 | (-0.543, 0.131) | 0.2046     |        |
| longitude | -           | 2011-1 to 2016-8  | 31  | 2000     | 0.533  | ( 0.221, 0.747) | 0.0020     | **     |
| latitude  | -           | 2011-1 to 2016-8  | 31  | 2000     | -0.018 | (-0.370, 0.339) | 0.9251     |        |
| effd1     | Mexico      | 2012-1 to 2015-40 | 25  | 2000     | 0.563  | ( 0.216, 0.784) | 0.0034     | **     |
| effd2     | Mexico      | 2012-1 to 2015-40 | 25  | 2000     | 0.599  | ( 0.268, 0.804) | 0.0015     | **     |
| effd1     | China       | 2012-1 to 2015-40 | 25  | 2000     | -0.320 | (-0.635, 0.086) | 0.1187     |        |
| longitude | -           | 2012-1 to 2015-40 | 25  | 2000     | 0.591  | ( 0.256, 0.799) | 0.0019     | **     |
| latitude  | -           | 2012-1 to 2015-40 | 25  | 2000     | 0.087  | (-0.319, 0.466) | 0.6785     |        |
| effd1     | Mexico      | 2012-1 to 2016-8  | 25  | 2000     | 0.412  | ( 0.020, 0.694) | 0.0408     | *      |
| effd2     | Mexico      | 2012-1 to 2016-8  | 25  | 2000     | 0.447  | ( 0.063, 0.716) | 0.0250     | *      |
| effd1     | China       | 2012-1 to 2016-8  | 25  | 2000     | -0.313 | (-0.630, 0.094) | 0.1278     |        |
| longitude | -           | 2012-1 to 2016-8  | 25  | 2000     | 0.499  | ( 0.129, 0.747) | 0.0112     | *      |
| latitude  | -           | 2012-1 to 2016-8  | 25  | 2000     | -0.064 | (-0.448, 0.340) | 0.7611     |        |

## S2 Proportions of B virus v.s. country median age

Table S2: Summary of correlation tests of proportions of B virus against country median age. A marginally negative correlation is detected when a threshold of 500 cases is used.

| factor     | time interval     | $n$ | $\theta$ | $\rho$ | 95%CI            | $p$ -value | signif |
|------------|-------------------|-----|----------|--------|------------------|------------|--------|
| median.age | 2006-1 to 2016-8  | 74  | 500      | -0.295 | (-0.491, -0.072) | 0.0106     | *      |
| median.age | 2006-1 to 2008-52 | 48  | 500      | -0.354 | (-0.580, -0.078) | 0.0135     | *      |
| median.age | 2010-1 to 2016-8  | 74  | 500      | -0.294 | (-0.490, -0.071) | 0.0109     | *      |
| median.age | 2010-1 to 2015-40 | 74  | 500      | -0.283 | (-0.480, -0.058) | 0.0147     | *      |
| median.age | 2006-1 to 2016-8  | 34  | 2000     | -0.025 | (-0.361, 0.315)  | 0.8864     |        |
| median.age | 2006-1 to 2008-52 | 30  | 2000     | -0.260 | (-0.567, 0.110)  | 0.1646     |        |
| median.age | 2010-1 to 2016-8  | 34  | 2000     | -0.054 | (-0.385, 0.289)  | 0.7610     |        |
| median.age | 2010-1 to 2015-40 | 34  | 2000     | -0.120 | (-0.440, 0.228)  | 0.5005     |        |

We downloaded country median age from [https://en.wikipedia.org/wiki/List\\_of\\_countries\\_by\\_median\\_age](https://en.wikipedia.org/wiki/List_of_countries_by_median_age) (checked on March 22, 2016).

### S3 Patterns of total confirmations

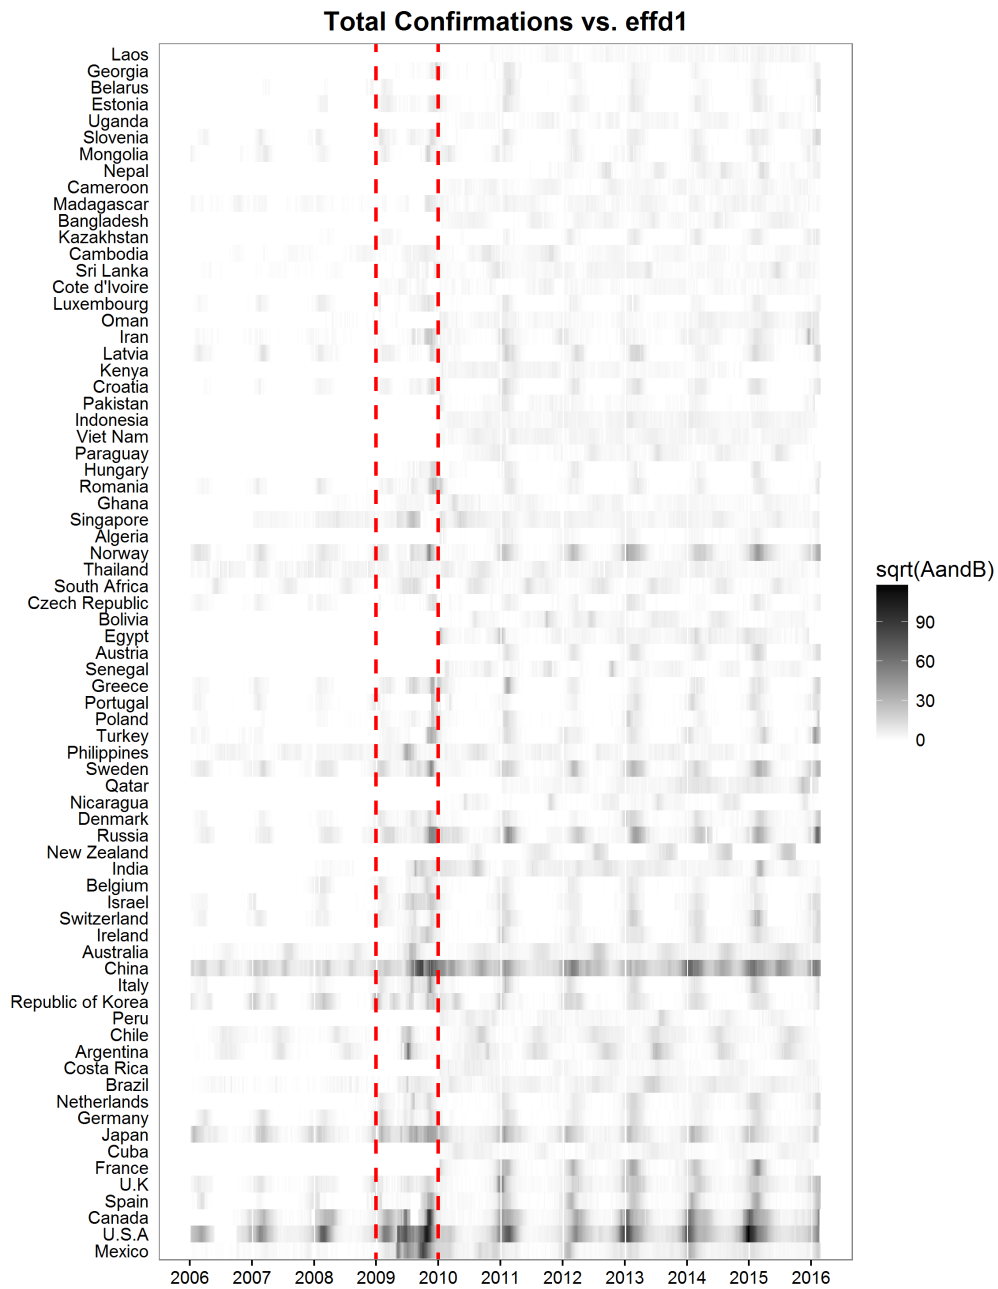

Figure S1: Patterns of total confirmations. Countries are ordered according to their effective distances to Mexico (definition 1).

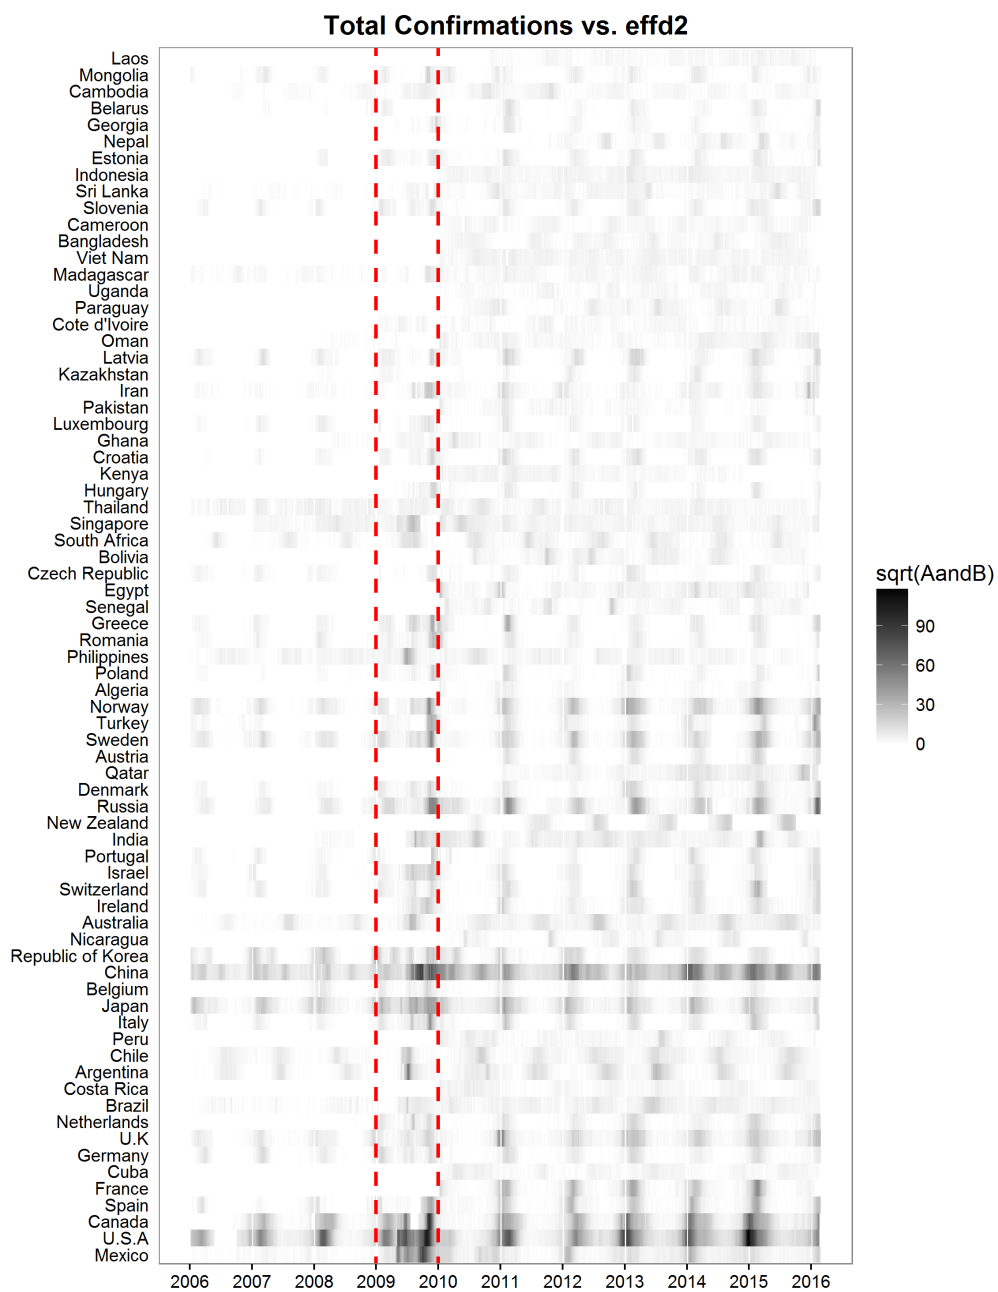

Figure S2: Patterns of total confirmations. Countries are ordered according to their effective distances to Mexico (definition 2).

# S4 Patterns of proportions of B Lineages

## S4.1 Proportions of B Lineages v.s. median age

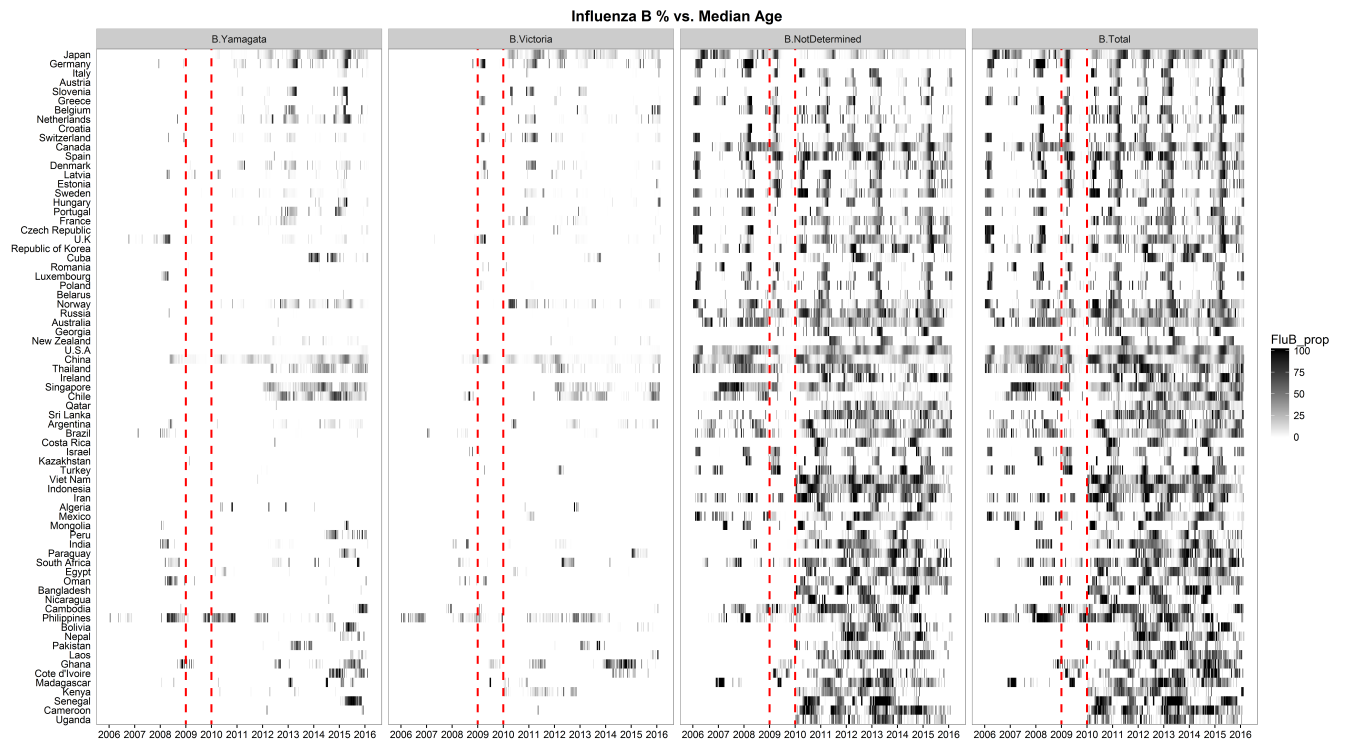

Figure S3: Patterns of proportions of different B lineages out of total of A and B. Countries are ordered according to the population's median ages.

## S4.2 Confirmations of B Lineages v.s. effective distances

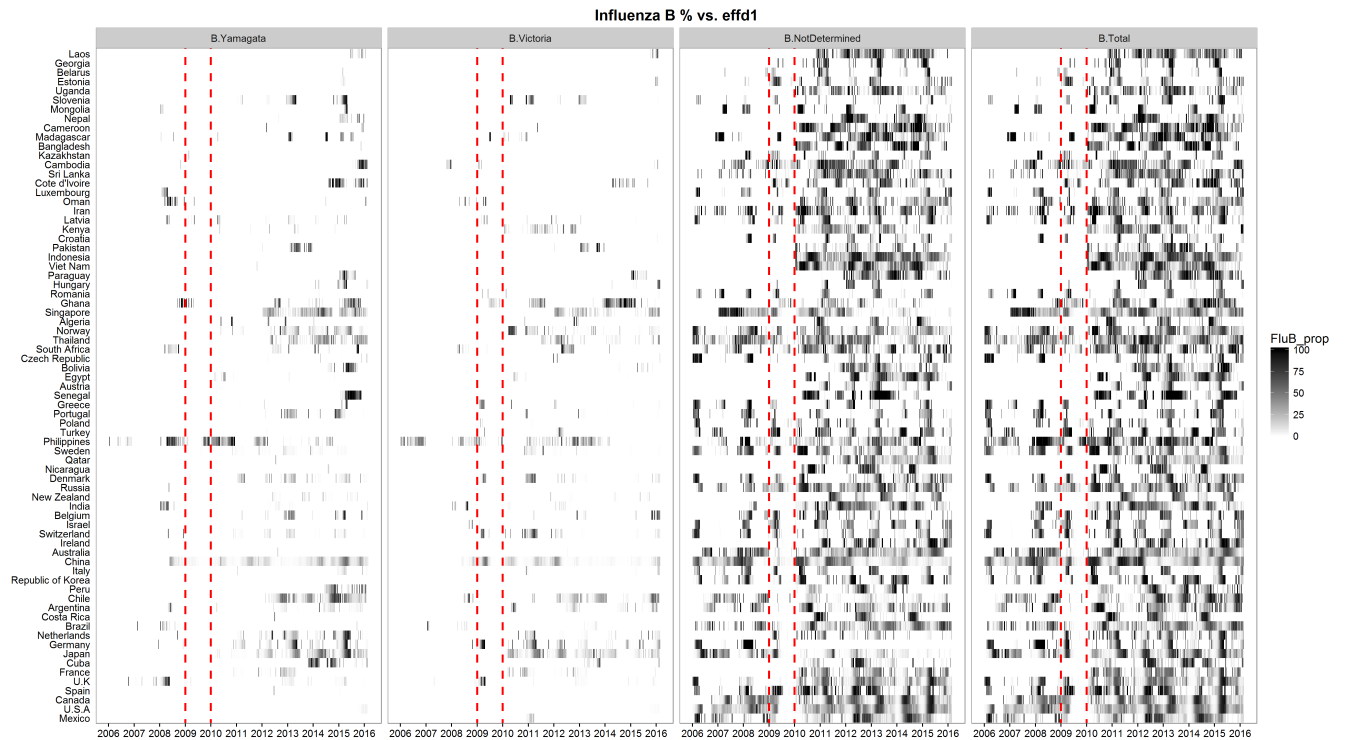

Figure S4: Patterns of proportions of different B lineages out of total of A and B. Countries are ordered according to the effective distance (definition 1) from Mexico.

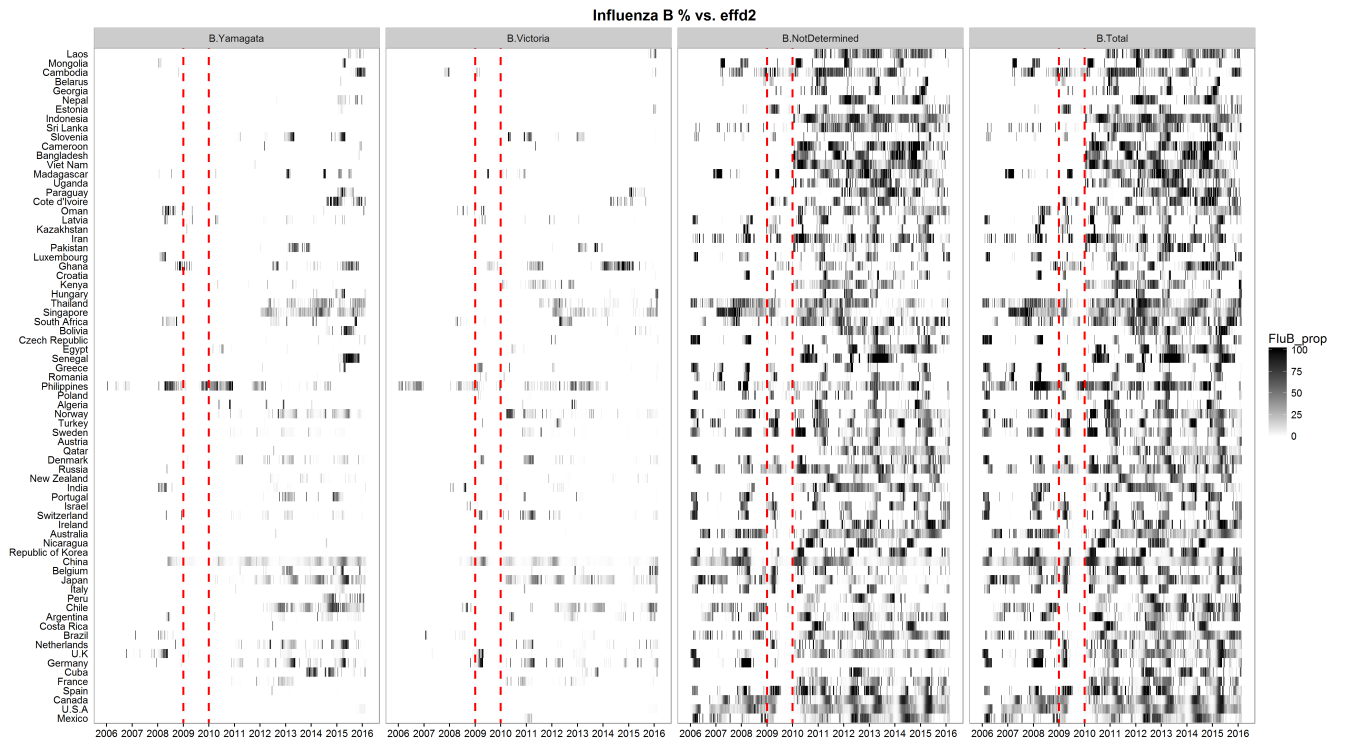

Figure S5: Patterns of proportions of different B lineages out of total of A and B. Countries are ordered according to the effective distance (definition 2) from Mexico.

### S4.3 Proportions of B Lineages v.s. longitude and latitude

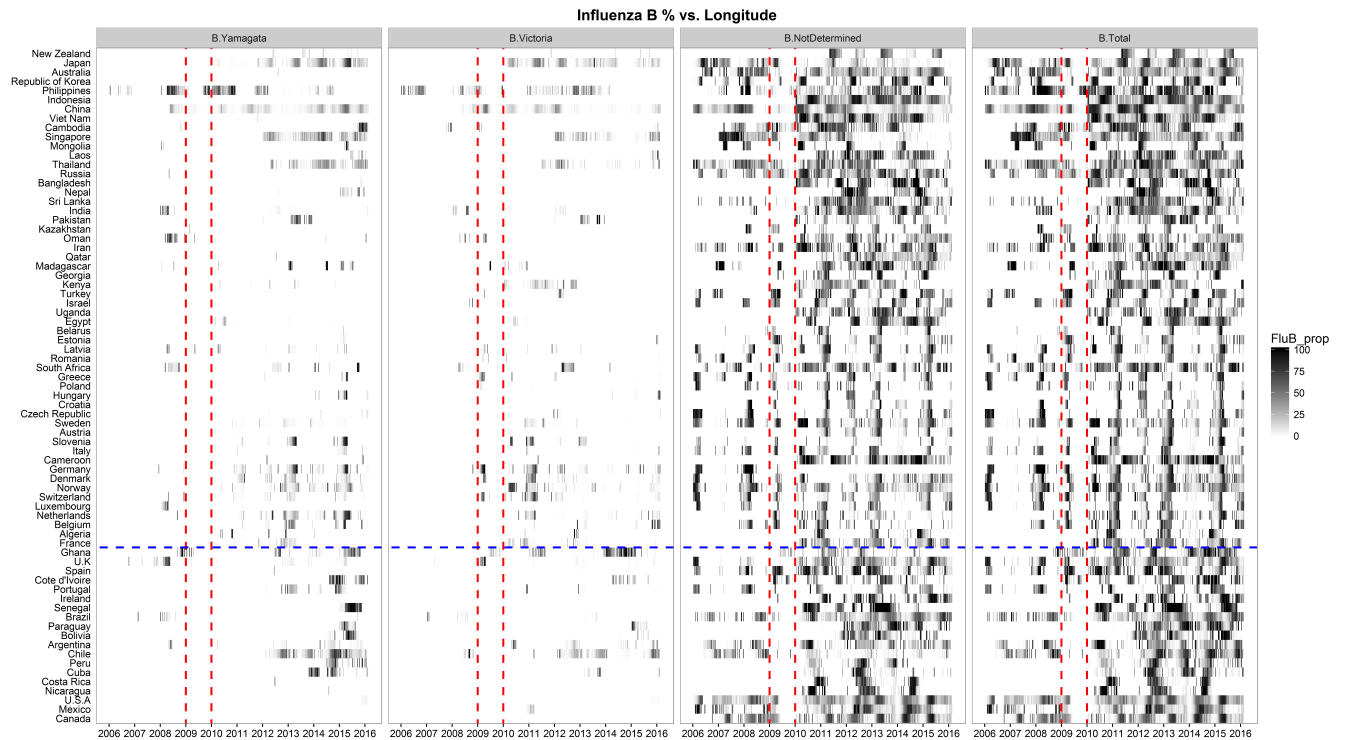

Figure S6: Patterns of proportions of different B lineages out of total of A and B. Countries are ordered according to longitude.



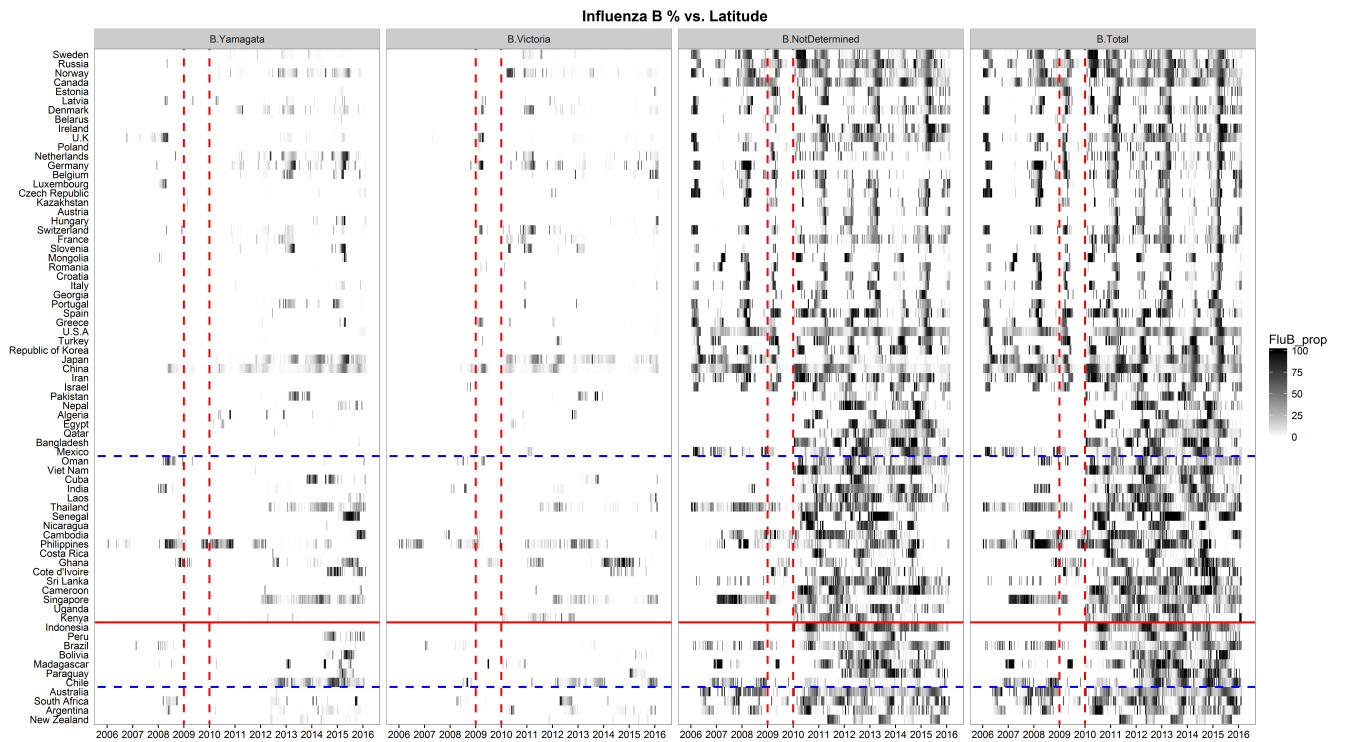

Figure S7: Patterns of proportions of different B lineages out of total of A and B. Countries are ordered according to latitude.

## S5 A variety of models with or without region as a random-effect factor

A variety of models with or without region as a random-effect factor

Linear mixed model fit by REML ['lmerMod']

Formula:  $r \sim \text{pop} + \text{long} + \text{abslat} + \text{effd} + (1 \mid \text{region})$

Data: rr

REML criterion at convergence: -162.7

Scaled residuals:

|  | Min      | 1Q       | Median  | 3Q      | Max     |
|--|----------|----------|---------|---------|---------|
|  | -2.41305 | -0.52911 | 0.05728 | 0.69284 | 2.02150 |

Random effects:

| Groups | Name        | Variance  | Std.Dev. |
|--------|-------------|-----------|----------|
| region | (Intercept) | 0.0004447 | 0.02109  |
|        | Residual    | 0.0042312 | 0.06505  |

Number of obs: 77, groups: region, 19

Fixed effects:

|             | Estimate  | Std. Error | t value |
|-------------|-----------|------------|---------|
| (Intercept) | 0.274755  | 0.009241   | 29.731  |
| pop         | -0.002384 | 0.008135   | -0.293  |
| long        | 0.022551  | 0.009811   | 2.299   |
| abslat      | -0.004060 | 0.008993   | -0.451  |
| effd        | 0.022670  | 0.009025   | 2.512   |

Correlation of Fixed Effects:

|        | (Intr) | pop    | long   | abslat |
|--------|--------|--------|--------|--------|
| pop    | -0.008 |        |        |        |
| long   | 0.019  | -0.238 |        |        |
| abslat | 0.058  | -0.009 | 0.050  |        |
| effd   | 0.010  | 0.295  | -0.418 | -0.012 |

Linear mixed model fit by REML ['lmerMod']

Formula:  $r \sim \text{specimens} + \text{long} + \text{abslat} + \text{effd} + (1 \mid \text{region})$

Data: rr

REML criterion at convergence: -161.5

Scaled residuals:

|  | Min      | 1Q       | Median   | 3Q      | Max     |
|--|----------|----------|----------|---------|---------|
|  | -2.41554 | -0.48051 | -0.00582 | 0.73237 | 2.03358 |

Random effects:

| Groups   | Name        | Variance  | Std.Dev. |
|----------|-------------|-----------|----------|
| region   | (Intercept) | 0.0006186 | 0.02487  |
| Residual |             | 0.0039121 | 0.06255  |

Number of obs: 75, groups: region, 19

Fixed effects:

|             | Estimate  | Std. Error | t value |
|-------------|-----------|------------|---------|
| (Intercept) | 0.277405  | 0.009716   | 28.550  |
| specimens   | 0.007829  | 0.008800   | 0.890   |
| long        | 0.027741  | 0.010224   | 2.713   |
| abslat      | -0.003936 | 0.009331   | -0.422  |
| effd        | 0.021356  | 0.009560   | 2.234   |

Correlation of Fixed Effects:

|           | (Intr) | spcmns | long   | abslat |
|-----------|--------|--------|--------|--------|
| specimens | -0.055 |        |        |        |
| long      | 0.066  | 0.020  |        |        |
| abslat    | 0.092  | -0.126 | 0.073  |        |
| effd      | -0.045 | 0.381  | -0.381 | -0.075 |

Call:

```
lm(formula = r ~ pop + long + abslat + effd, data = rr)
```

Residuals:

| Min       | 1Q        | Median   | 3Q       | Max      |
|-----------|-----------|----------|----------|----------|
| -0.171101 | -0.042221 | 0.005935 | 0.045810 | 0.153983 |

Coefficients:

|             | Estimate  | Std. Error | t value | Pr(> t )    |
|-------------|-----------|------------|---------|-------------|
| (Intercept) | 0.273880  | 0.007732   | 35.420  | < 2e-16 *** |
| pop         | -0.002944 | 0.008209   | -0.359  | 0.72089     |
| long        | 0.026653  | 0.008857   | 3.009   | 0.00361 **  |
| abslat      | -0.003699 | 0.007762   | -0.477  | 0.63510     |
| effd        | 0.020509  | 0.008941   | 2.294   | 0.02472 *   |

---

Signif. codes: 0 \*\*\* 0.001 \*\* 0.01 \* 0.05 . 0.1 1

Residual standard error: 0.06785 on 72 degrees of freedom

(1 observation deleted due to missingness)

Multiple R-squared: 0.2703, Adjusted R-squared: 0.2298

F-statistic: 6.668 on 4 and 72 DF, p-value: 0.000127

Call:

```
lm(formula = r ~ specimens + long + abslat + effd, data = rr)
```

Residuals:

| Min      | 1Q       | Median  | 3Q      | Max     |
|----------|----------|---------|---------|---------|
| -0.16828 | -0.03902 | 0.00469 | 0.04140 | 0.15632 |

Coefficients:

|             | Estimate  | Std. Error | t value | Pr(> t )     |
|-------------|-----------|------------|---------|--------------|
| (Intercept) | 0.276333  | 0.007702   | 35.877  | < 2e-16 ***  |
| specimens   | 0.009057  | 0.008577   | 1.056   | 0.294610     |
| long        | 0.032161  | 0.008998   | 3.574   | 0.000641 *** |
| abslat      | -0.004274 | 0.007685   | -0.556  | 0.579894     |
| effd        | 0.020039  | 0.009602   | 2.087   | 0.040523 *   |

---

Signif. codes: 0 \*\*\* 0.001 \*\* 0.01 \* 0.05 . 0.1 1

Residual standard error: 0.06656 on 70 degrees of freedom  
(3 observations deleted due to missingness)

Multiple R-squared: 0.3043, Adjusted R-squared: 0.2646

F-statistic: 7.656 on 4 and 70 DF, p-value: 3.552e-05

Single term deletions

Model:

```
r ~ pop + long + abslat + effd + (region)
```

|        | Df | Sum of Sq | RSS     | AIC     | F value | Pr(>F)    |
|--------|----|-----------|---------|---------|---------|-----------|
| <none> |    |           | 0.22646 | -402.83 |         |           |
| pop    | 1  | 0.001002  | 0.22747 | -404.49 | 0.2388  | 0.62703   |
| long   | 1  | 0.006700  | 0.23316 | -402.59 | 1.5977  | 0.21166   |
| abslat | 1  | 0.000100  | 0.22656 | -404.80 | 0.0238  | 0.87799   |
| effd   | 1  | 0.019464  | 0.24593 | -398.48 | 4.6411  | 0.03569 * |
| region | 18 | 0.104956  | 0.33142 | -409.51 | 1.3904  | 0.17457   |

---

Signif. codes: 0 \*\*\* 0.001 \*\* 0.01 \* 0.05 . 0.1 1
